# Supplementary material for: Comprehensive characterization of clonality of driver genes revealing their clinical relevance in colorectal cancer
Source: Springer Nature journal article supplement (doi:10.1186/s12967-022-03529-x), 2022-08-12
Supplement: MOESM1 [file 23361650]

SUPPLEMENTARY INFORMATION

SUPPLEMENTARY FIGURES

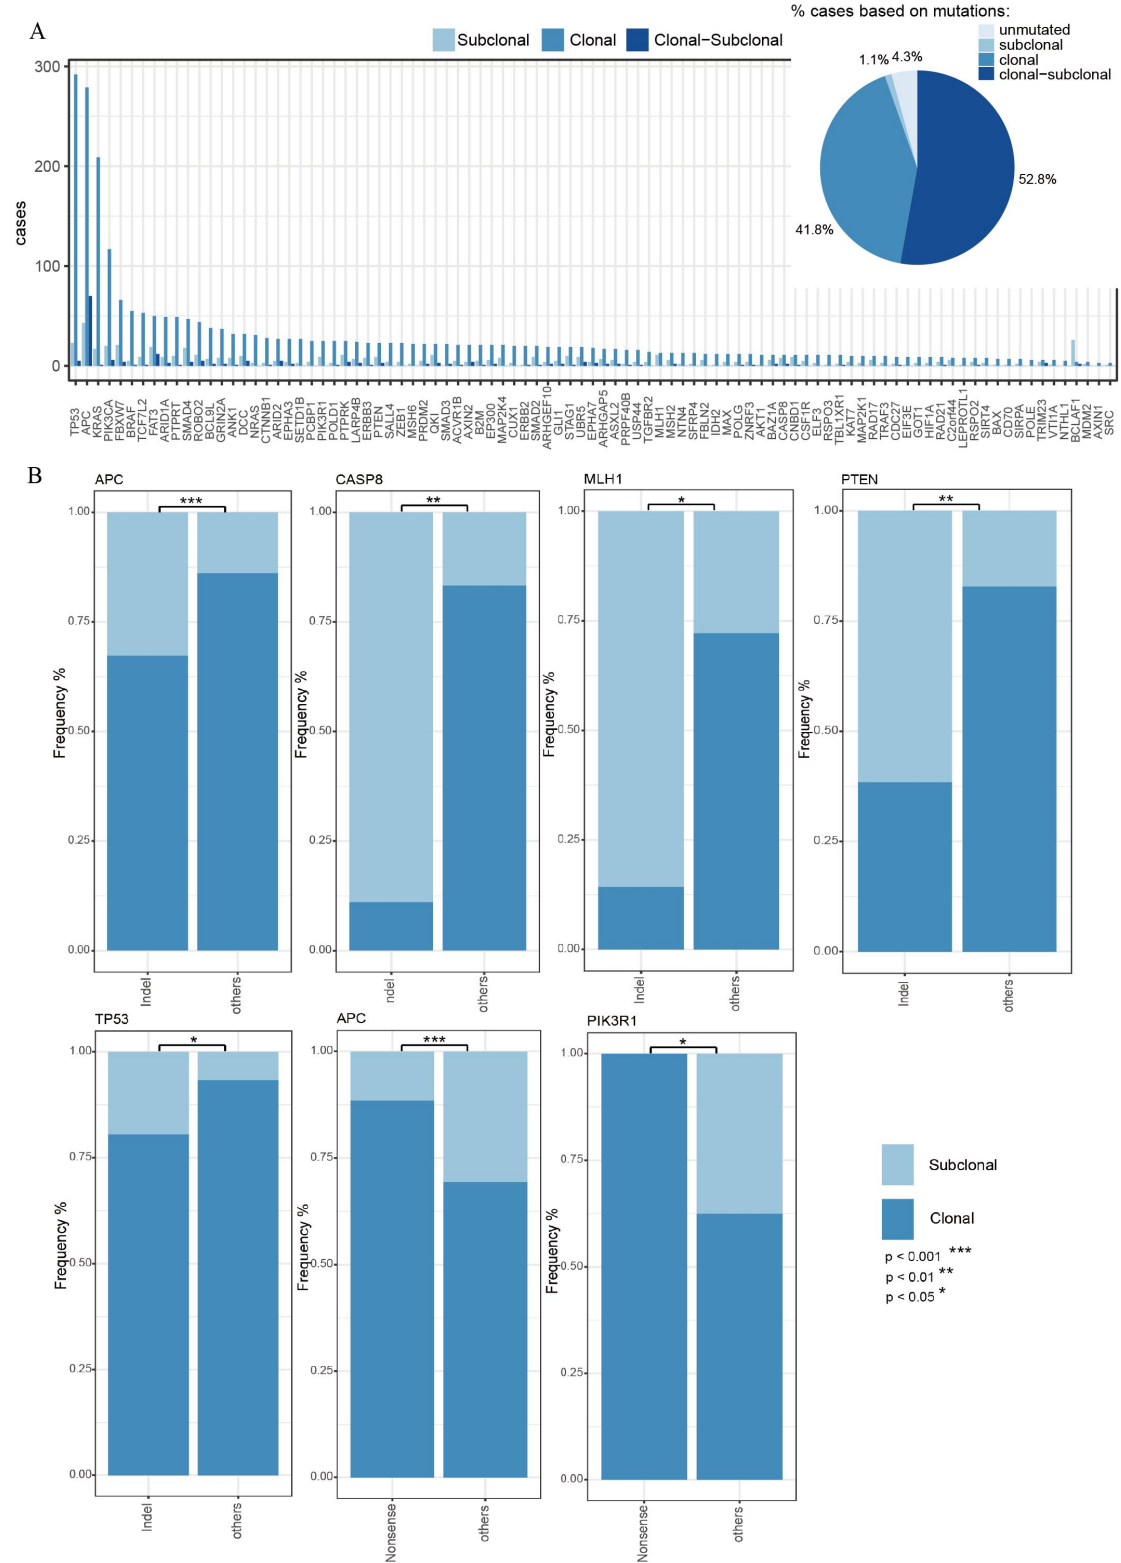

**Supplementary Fig. 1. Deep characterization of the clonal architecture of the 93 driver genes.**

(a) Pie chart of the proportion of patients grouped according to their mutational clonality in the entire cohort of 536 patients (top-right corner). The number of patients carrying subclonal, clonal, and clonal-subclonal mutations in each gene. (b) The proportion of Indel (Nonsense) versus other mutation types that are clonal/subclonal is indicated for each driver gene. Dark blue represents clonal mutations, and light blue represents subclonal mutations. P-value was calculated from Fisher's exact test.

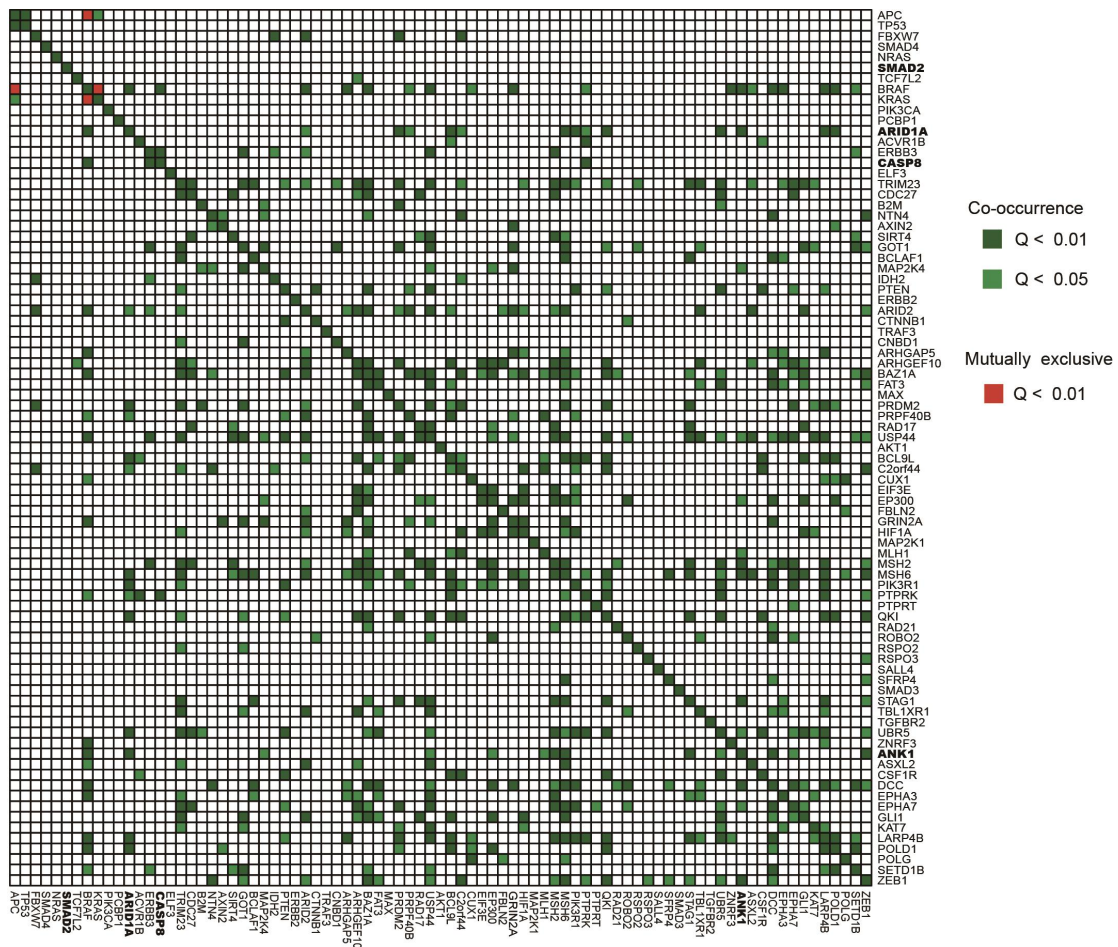

**Supplementary Fig. 2.** Heatmap of the co-occurrence of the driver mutations identified in  $\geq 10$  patients by representing the adjusted P-value of the Fisher's exact test. Genes with prognostic value in the Kaplan–Meier analysis are depicted in bold.

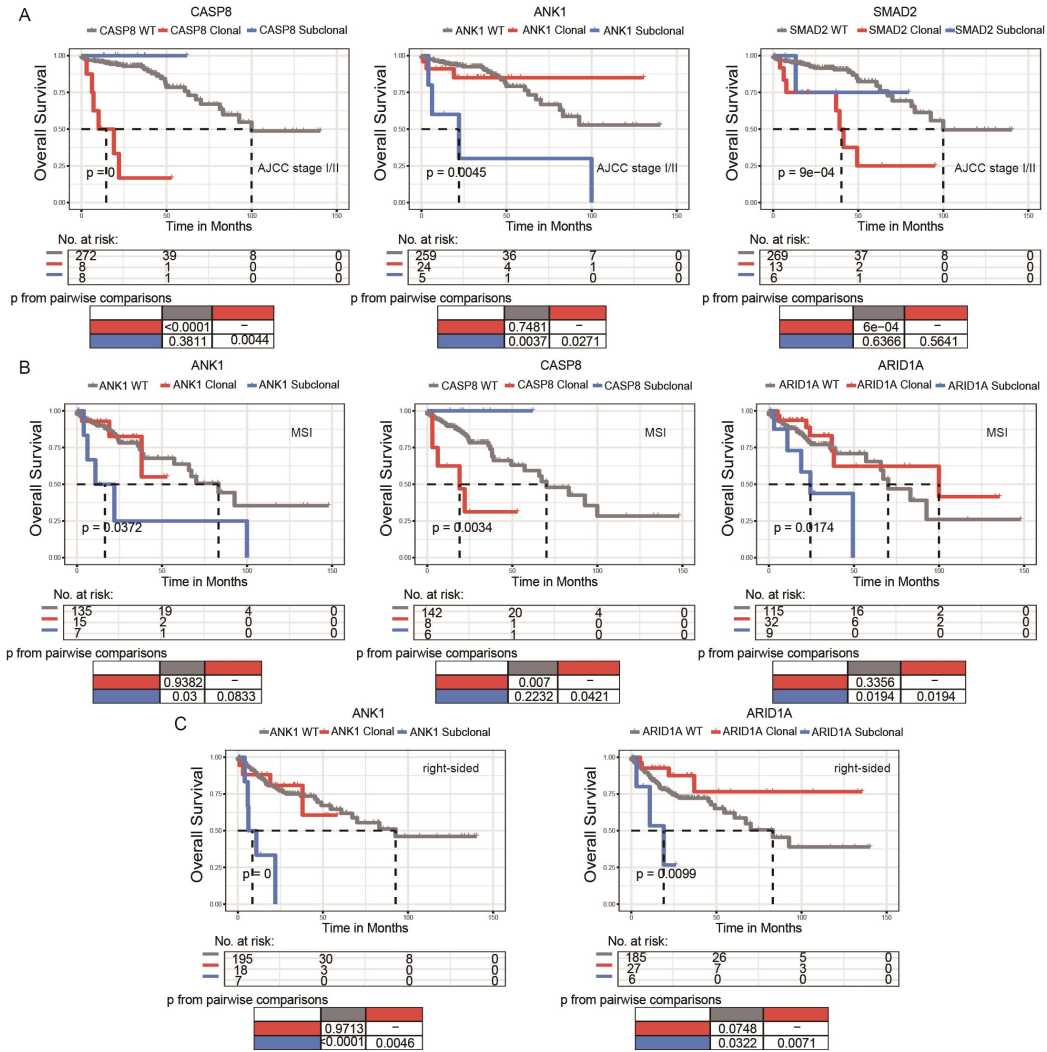

**Supplementary Fig. 3. Subgroup analysis for CRC patients according to the TNM stage, MSI status, and tumor location. (a).** Kaplan–Meier estimates overall survival among AJCC stage I/II patients harboring clonal or subclonal *CASP8*, *ANK1*, and *SMAD2* mutations. **(b).** Kaplan–Meier estimates overall survival in MSI patients harboring clonal or subclonal *ANK1*, *CASP8*, *ARID1A* mutations. **(c).** Kaplan–Meier estimates overall survival in right-sided patients harboring clonal or subclonal *ANK1*, *ARID1A* mutations.

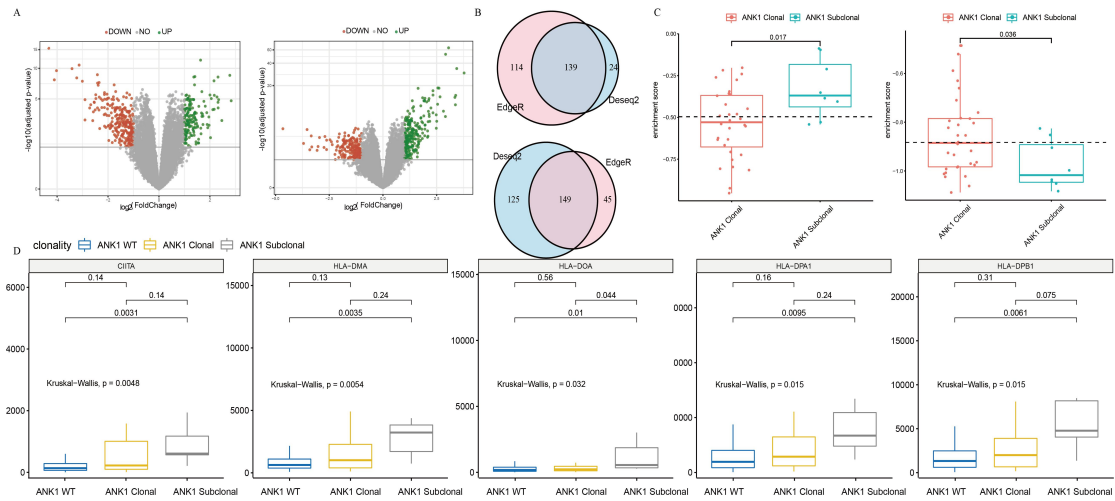

**Supplementary Fig. 4. *ANK1*-mutant gene expression signature.** (a) Differential expression analysis results between patients with ANK1 mutations and without ANK1 mutations are displayed in volcano plots using DESeq2 and EdgeR, where red represents downregulated genes and green represents upregulated genes. (b) Venn diagrams showing the intersection of upregulated genes and downregulated genes, respectively. (c) The difference in ssGSEA enrichment scores of ANK1-mutant upregulated (left panel) and downregulated (right panel) gene expression signature between cases with subclonal ANK1 mutations and cases with ANK1 clonal mutations. P-value is calculated by the Wilcoxon rank-sum test. (d) Differential expression of major histocompatibility complex (MHC) class II and MHC class II transactivator CIITA among CRC patients with clonal ANK1 mutation (yellow), subclonal ANK1 mutation (gray), and ANK1 wide type (blue).



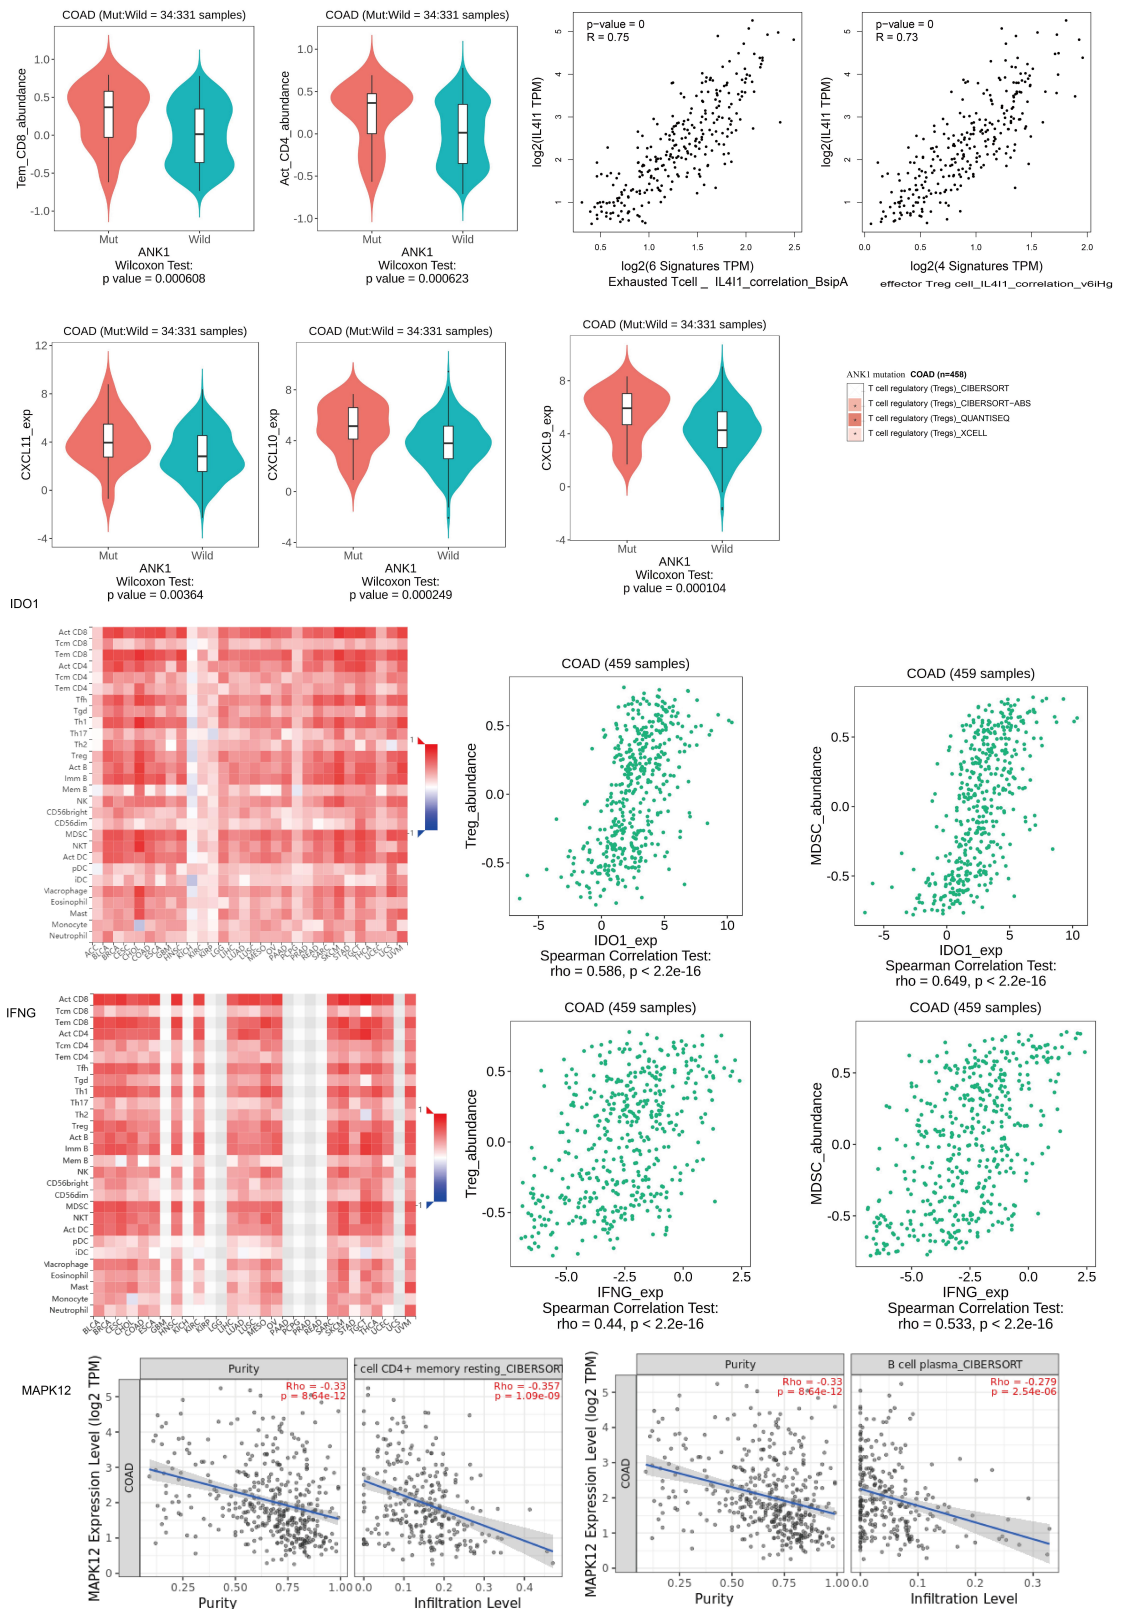

**Supplementary Fig. 5.** Correlations between of ANK1, ANK1-driven genes IDO1, IFNG, MAPK12 and immune cells in CRC using TISIDB, TIMER and GEPIA.

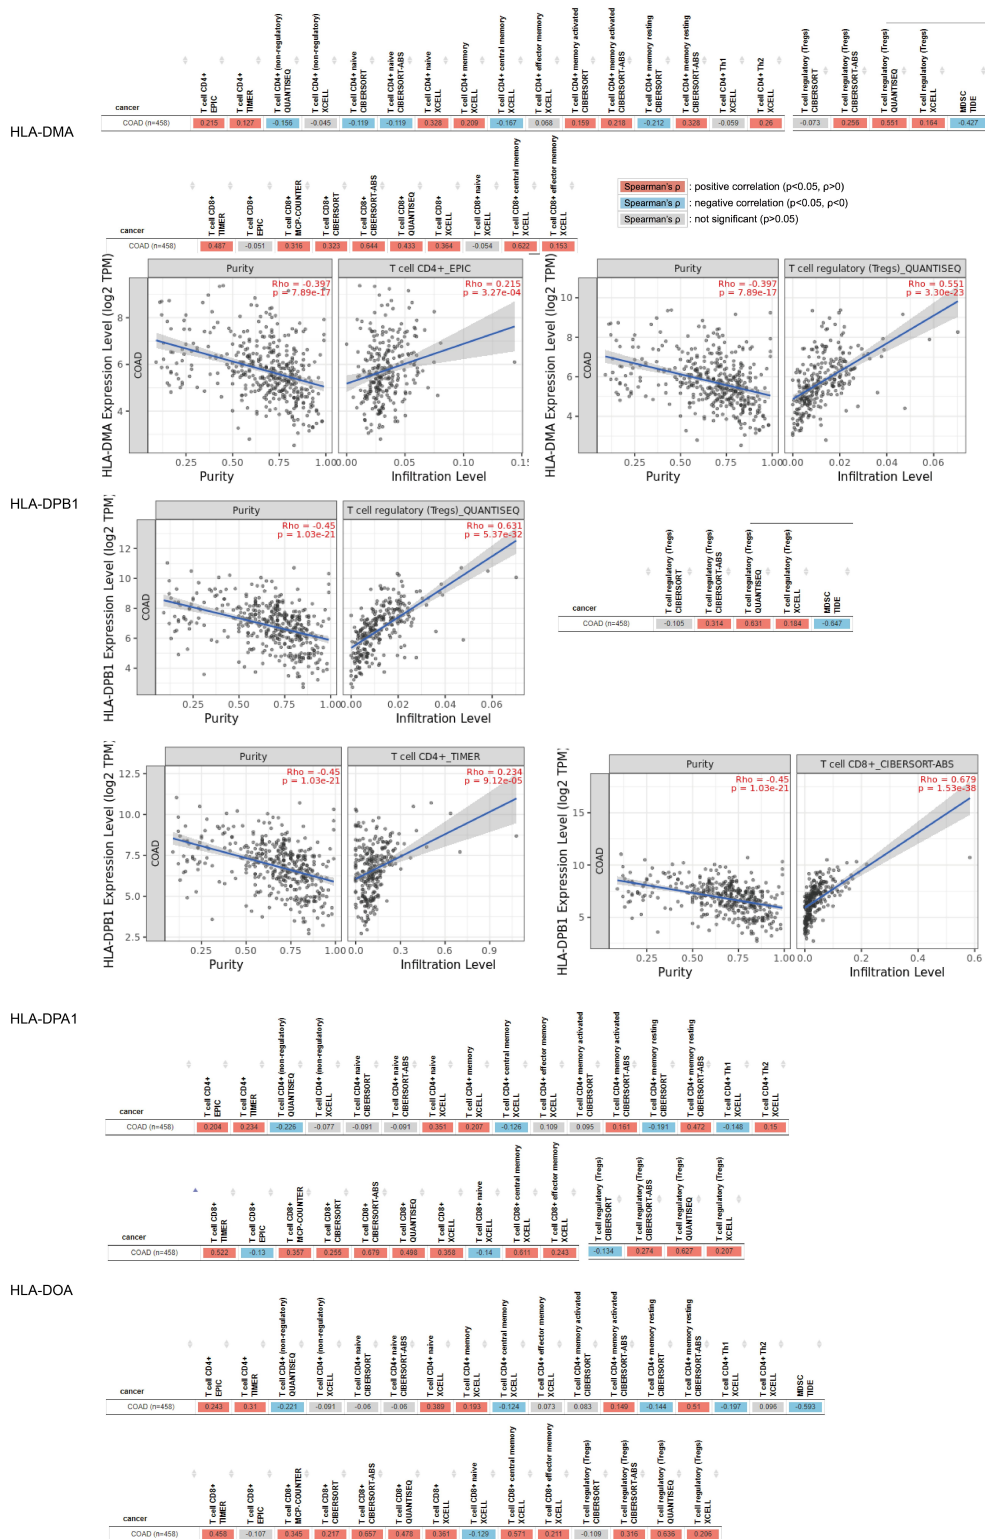

**Supplementary Fig. 6.** Correlations between of ANK1 subclonal mutation-driven major histocompatibility complex (MHC) class II and immune cells in CRC using TISIDB, TIMER and GEPIA.

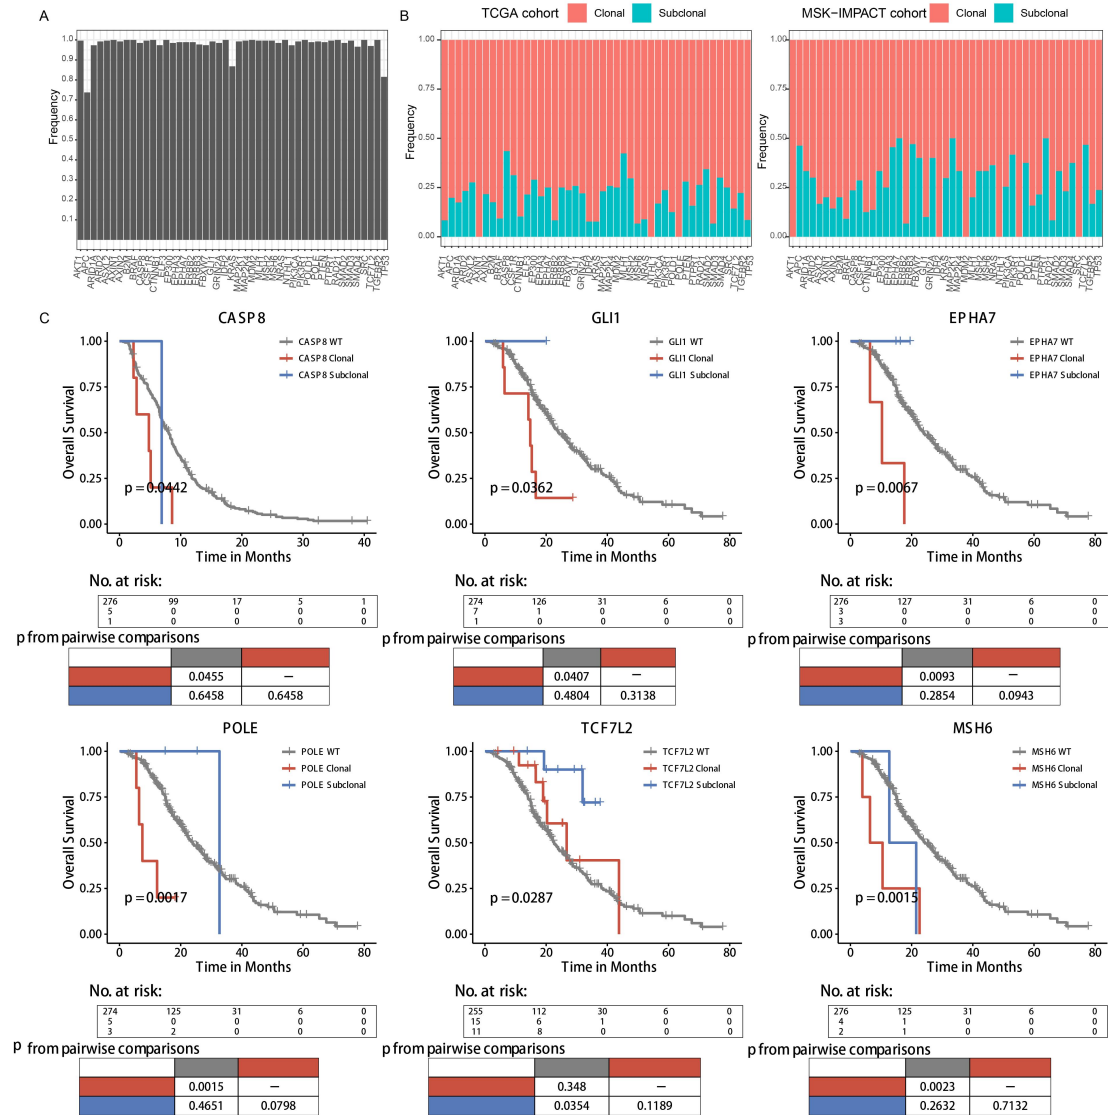

**Supplementary Fig. 7 Assessing the consistency of clonality status of driver genes in the validation dataset (A) consistency of clonality of driver genes derived from ABSOLUTE method and approach proposed by McGranahan et al using an independent data set. The y-axis represents the proportion of samples with consistent clonal status of the driver gene. (B) Clonality distribution of mutations in CRC driver genes. The driver genes tend to be clonal in TCGA colorectal cohort (left-panel) and MSK-IMPACT cohort (right-panel). (C) Survival analysis of driver genes in the MSK-IMPACT colorectal cohort. Comparison of overall survival among patients carrying clonal mutations (red line), subclonal mutations (blue line), and patients harboring unmutated genes (gray line) by Kaplan–Meier analysis (with log-rank values) in the cohort of colorectal cancer patients from MSK-IMPACT.**

## SUPPLEMENTARY TABLES

Supplementary Table 1. Clinical and pathological parameters of patients in TCGA CRC cohort.

| Parameters     | Patient Num (%) | Parameters      | Patient Num (%) |
|----------------|-----------------|-----------------|-----------------|
| n (%)          | 536 (100)       |                 |                 |
| Sex (%)        |                 |                 |                 |
| Male           | 279(52.1)       | Stage 4         | 73 (13.6)       |
| Female         | 257(47.9)       | NA              | 19 ( 3.5)       |
| MSI status (%) |                 | Age (%)         |                 |
| MSI            | 158(29.5)       | >= 67.5         | 268 (50.0)      |
| MSS            | 376(70.1)       | <67.5           | 268 (50.0)      |
| NA             | 2(0.4)          | Tumour site (%) |                 |
| T stage (%)    |                 | left-sided      | 297 (55.4)      |
| T1             | 17 ( 3.2)       | right-sided     | 221 (41.2)      |
| T2             | 97 (18.1)       | NA              | 18 ( 3.4)       |
| T3             | 361 (67.4)      |                 |                 |
| T4             | 59 (11.0)       |                 |                 |
| NA             | 2 ( 0.4)        |                 |                 |
| N stage (%)    |                 |                 |                 |
| N0             | 308 (57.5)      |                 |                 |
| N1             | 133 (24.8)      |                 |                 |
| N2             | 93 (17.4)       |                 |                 |
| NA             | 2 ( 0.4)        |                 |                 |
| M stage (%)    |                 |                 |                 |
| M0             | 394 (73.5)      |                 |                 |
| M1             | 72 (13.4)       |                 |                 |
| NA             | 70 (13.1)       |                 |                 |
| TNM stage (%)  |                 |                 |                 |
| Stage 1        | 95 (17.7)       |                 |                 |
| Stage 2        | 196 (36.6)      |                 |                 |
| Stage 3        | 153 (28.5)      |                 |                 |

Supplementary Table 2. The associations between the clonality of driver genes and the mutation type.

| Molecular characteristic | The number of mutations in clonality | The number of mutations in subclonality | P         | OR(CI)             |
|--------------------------|--------------------------------------|-----------------------------------------|-----------|--------------------|
| APC                      | Clonal                               | Subclonal                               |           |                    |
| Indel                    | 136                                  | 66                                      | 6.963e-08 | 0.33 (0.22-0.50)   |
| Others                   | 379                                  | 61                                      |           |                    |
| CASP8                    | Clonal                               | Subclonal                               |           |                    |
| Indel                    | 1                                    | 8                                       | 0.001905  | 0.033(0.0005-0.43) |
| Others                   | 10                                   | 2                                       |           |                    |
| MLH1                     | Clonal                               | Subclonal                               |           |                    |
| Indel                    | 1                                    | 6                                       | 0.02128   | 0.073(0.001-0.82)  |
| Others                   | 13                                   | 5                                       |           |                    |
| PTEN                     | Clonal                               | Subclonal                               |           |                    |
| Indel                    | 5                                    | 8                                       | 0.004845  | 0.14(0.025-0.66)   |
| Others                   | 29                                   | 6                                       |           |                    |
| TP53                     | Clonal                               | Subclonal                               |           |                    |
| Indel                    | 33                                   | 8                                       | 0.01159   | 0.299(0.11-0.85)   |
| Others                   | 277                                  | 20                                      |           |                    |
| APC                      | Clonal                               | Subclonal                               |           |                    |
| Nonsense                 | 322                                  | 42                                      | 2.394e-09 | 3.37(2.20-5.22)    |
| Others                   | 193                                  | 85                                      |           |                    |
| PIK3R1                   | Clonal                               | Subclonal                               |           |                    |
| Nonsense                 | 11                                   | 0                                       | 0.03311   | Inf(1.115381-Inf)  |
| Others                   | 15                                   | 9                                       |           |                    |

Supplementary Table 3. Univariate and multivariate analysis of mutation status of driver genes.

|                           | Univariate analysis |            |        | Multivariate analysis |            |        | Stepwise analysis |            |       |
|---------------------------|---------------------|------------|--------|-----------------------|------------|--------|-------------------|------------|-------|
|                           | HR                  | CI         | P      | HR                    | CI         | P      | HR                | CI         | P     |
| SMAD2                     |                     |            |        |                       |            |        |                   |            |       |
| MUT vs WT                 | 1.14                | 0.28-4.63  | .02    | 3.17                  | 1.43-7.04  | .0047  | 3.73              | 1.84-7.59  | <.001 |
| GRIN2A                    |                     |            |        |                       |            |        |                   |            |       |
| Mut vs WT                 | 1.71                | 1.02-2.86  | .04    | 1.02                  | 0.52-1.98  | .96    | -                 | -          | -     |
| CASP8                     |                     |            |        |                       |            |        |                   |            |       |
| Mut vs WT                 | 2.26                | 1.10-4.65  | .026   | 2.09                  | 0.86-5.05  | .10    | 1.98              | 0.85-4.66  | .12   |
| AKT1                      |                     |            |        |                       |            |        |                   |            |       |
| Mut vs WT                 | 2.47                | 1.20-5.07  | .014   | 1.13                  | 0.42-2.99  | .81    | -                 | -          | -     |
| AXIN2                     |                     |            |        |                       |            |        |                   |            |       |
| Mut vs WT                 | 1.85                | 0.99-3.44  | .052   | 1.80                  | 0.76-4.29  | .18    | -                 | -          | -     |
| BCLAF1                    |                     |            |        |                       |            |        |                   |            |       |
| Mut vs WT                 | 1.95                | 1.07-3.56  | .03    | 1.91                  | 0.83-4.43  | .13    | 1.98              | 0.91-4.3   | .084  |
| CD70                      |                     |            |        |                       |            |        |                   |            |       |
| Mut vs WT                 | 3.00                | 1.22-7.78  | .02    | 1.37                  | 0.46-4.11  | .57    | -                 | -          | -     |
| CNBD1                     |                     |            |        |                       |            |        |                   |            |       |
| Mut vs WT                 | 0.17                | 0.024-1.23 | .08    | 0.12                  | 0.15-0.94  | .04    | 0.12              | 0.02-0.92  | .04   |
| Age                       |                     |            |        |                       |            |        |                   |            |       |
| >= 67.5 vs < 67.5         | 2.1                 | 1.44-3.17  | 2e-04  | 3.44                  | 2.15-5.51  | <.0001 | 3.51              | 2.21, 5.58 | <.001 |
| Sex                       |                     |            |        |                       |            |        |                   |            |       |
| Male vs Female            | 1.05                | 0.73-1.52  | .79    | 0.73                  | 0.47-1.12  | .15    | 0.7               | 0.46-1.07  | .10   |
| Tumour_site               |                     |            |        |                       |            |        |                   |            |       |
| Left vs Right             | 0.72                | 0.49-1.04  | .08    | 0.93                  | 0.58-1.48  | .75    | -                 | -          | -     |
| M_stage                   |                     |            |        |                       |            |        |                   |            |       |
| M1 vs M0                  | 3.92                | 2.56-5.99  | <.0001 | 2.67                  | 1.52-4.70  | 6e-04  | 2.86              | 1.70-4.82  | <.001 |
| N_stage                   |                     |            |        |                       |            |        |                   |            |       |
| N1/N2 vs N0               | 2.47                | 1.70-3.59  | <.0001 | 0.53                  | 0.17-1.68  | .28    | -                 | -          | -     |
| T_stage                   |                     |            |        |                       |            |        |                   |            |       |
| T3/T4 vs T1/T2            | 2.46                | 1.28-4.72  | .006   | 2.17                  | 0.89-5.24  | .08    | 1.96              | 0.84-4.6   | .12   |
| TNM_stage                 |                     |            |        |                       |            |        |                   |            |       |
| StageIII/IV vs Stage I/II | 2.70                | 1.82-4.01  | <.0001 | 5.88                  | 1.70-20.26 | .005   | 3.14              | 1.81-5.45  | <.001 |
| MSI status                |                     |            |        |                       |            |        |                   |            |       |
| MSI vs MSS                | 0.80                | 0.54-1.15  | 0.22   | 1.19                  | 0.68-1.85  | .66    |                   |            |       |



Supplementary Table 4. Univariate and multivariate and backward-stepwise cox of the prognostic impact of clinicopathological variables and the clonality of driver genes in pan-cancer.

|                 | Univariate analysis |             |       | Multivariate analysis |             |       | Stepwise analysis |             |       | cancer type |
|-----------------|---------------------|-------------|-------|-----------------------|-------------|-------|-------------------|-------------|-------|-------------|
|                 | HR                  | CI          | P     | HR                    | CI          | P     | HR                | CI          | P     |             |
| NPM1            |                     |             |       |                       |             |       |                   |             |       | LAML        |
| Clonal vs WT    | 2.99                | 1.302-6.91  | 0.01  | 3.40                  | 1.47-7.88   | 0.004 | 3.49              | 1.51-8.06   | 0.004 |             |
| NRAS            |                     |             |       |                       |             |       |                   |             |       | LAML        |
| Subclonal vs WT | 16.97               | 2.26-127.49 | 0.006 | 33.05                 | 4.29-254.66 | <.001 | 29.11             | 3.82-222.01 | 0.001 |             |
| Clonal vs WT    | 1.61                | 0.22-11.54  | 0.637 | 1.16                  | 0.16-8.42   | 0.883 | 1.05              | 0.15-7.59   | 0.96  |             |
| USP44           |                     |             |       |                       |             |       |                   |             |       | COAD        |
| Clonal vs WT    | 9.61                | 1.30-71.26  | 0.027 | 9.38                  | 1.13-77.85  | 0.038 | 9.03              | 1.18-68.9   | 0.034 |             |
| MAP2K1          |                     |             |       |                       |             |       |                   |             |       | COAD        |
| Clonal vs WT    | 23.75               | 2.90-194.43 | 0.003 | 0                     | 0-Inf       | 0.997 | -                 | -           | -     |             |
| MAP2K4          |                     |             |       |                       |             |       |                   |             |       | COAD        |
| Subclonal vs WT | 0                   | 0-Inf       | 0.996 | 0                     | 0-Inf       | 0.997 | 0                 | 0-Inf       | 0.997 |             |
| Clonal vs WT    | 13.19               | 3.08-56.54  | <.001 | 17.06                 | 3.58-81.13  | <.001 | 19.71             | 4.37-88.88  | <.001 |             |
| SMAD2           |                     |             |       |                       |             |       |                   |             |       | COAD        |
| Subclonal vs WT | 4.28                | 1.03-17.76  | 0.045 | 30.778                | 2.70-350.58 | 0.006 | 34.51             | 3.07-388.13 | 0.004 |             |
| Clonal vs WT    | 2.01                | 0.63-6.45   | 0.240 | 2.73                  | 0.80-9.24   | 0.106 | 2.87              | 0.86-9.57   | 0.086 |             |
| BAZ1A           |                     |             |       |                       |             |       |                   |             |       | SARC        |
| Subclonal vs WT | 2.74                | 0.37-19.86  | 0.319 | 2.27                  | 0.31-16.80  | 0.423 | 2.24              | 0.31-16.39  | 0.428 |             |
| Clonal vs WT    | 14.06               | 1.85-106.60 | 0.011 | 18.32                 | 2.33-143.72 | 0.006 | 18.08             | 2.34-139.93 | 0.006 |             |
| CDKN2A          |                     |             |       |                       |             |       |                   |             |       | SKCM        |
| Subclonal vs WT | 3.12                | 0.99-9.84   | 0.052 | 11.60                 | 1.47-91.10  | 0.020 | 11.67             | 1.49-91.19  | 0.019 |             |
| Clonal vs WT    | 0.62                | 0.32-1.18   | 0.143 | 0.54                  | 0.25-1.19   | 0.125 | 0.53              | 0.24-1.16   | 0.112 |             |
| NFKBIE          |                     |             |       |                       |             |       |                   |             |       | SKCM        |
| Clonal vs WT    | 6.38                | 0.87-46.67  | 0.068 | 11.15                 | 1.41-88.16  | 0.022 | 12.27             | 1.57-95.9   | 0.017 |             |
| PREX2           |                     |             |       |                       |             |       |                   |             |       | SKCM        |

|           |       |           |       |       |         |       |       |         |       |      |
|-----------|-------|-----------|-------|-------|---------|-------|-------|---------|-------|------|
| Subclonal |       |           |       |       | 0.08-4. |       |       | 0.08-4. |       |      |
| vs WT     | 1.05  | 0.33-3.31 | 0.928 | 0.63  | 68      | 0.650 | 0.57  | 19      | 0.58  |      |
| Clonal vs |       |           |       |       | 0.18-0. |       |       | 0.19-0. |       |      |
| WT        | 0.37  | 0.21-0.65 | <.001 | 0.35  | 68      | 0.002 | 0.37  | 71      | 0.003 |      |
| PMS2      |       |           |       |       |         |       |       |         |       | READ |
| Subclonal | -     | -         | -     | -     | -       | -     | -     | -       | -     |      |
| vs WT     |       |           |       |       |         |       |       |         |       |      |
| Clonal vs |       | 1.96-270. |       |       |         |       |       | -       | -     | -    |
| WT        | 23.05 | 07        | 0.013 | 0     | 0-Inf   | 0.999 |       |         |       |      |
| ARID1B    |       |           |       |       |         |       |       |         |       | BRCA |
| Subclonal |       |           |       |       |         |       |       |         |       |      |
| vs WT     | 0     | 0-Inf     | 0.994 | 0     | 0-Inf   | 0.996 | 0     | 0-Inf   | 0.996 |      |
| Clonal vs |       | 1.12-64.2 |       |       | 1.30-79 |       |       | 1.26-7  |       |      |
| WT        | 8.49  | 3         | 0.038 | 10.14 | .16     | 0.027 | 9.72  | 4.99    | 0.029 |      |
| BRCA2     |       |           |       |       |         |       |       |         |       | BRCA |
| Subclonal |       | 2.51-143. |       |       | 1.42-92 |       |       | 1.96-3  |       |      |
| vs WT     | 19.01 | 95        | 0.004 | 11.48 | .67     | 0.022 | 8.42  | 6.06    | 0.004 |      |
| Clonal vs |       |           |       |       | 0.27-14 |       |       | 0.08-4. |       |      |
| WT        | 0.90  | 0.13-6.48 | 0.918 | 2.01  | .79     | 0.492 | 0.56  | 18      | 0.576 |      |
| ERBB2     |       |           |       |       |         |       |       |         |       | BRCA |
| Subclonal |       |           |       |       |         |       |       |         |       |      |
| vs WT     | 0     | 0-Inf     | 0.996 | 0     | 0-Inf   | 0.999 | 0     | 0-Inf   | 0.999 |      |
| Clonal vs |       | 1.33-10.0 |       |       | 1.39-10 |       |       | 1.28-9. |       |      |
| WT        | 3.66  | 3         | 0.012 | 3.88  | .81     | 0.009 | 3.54  | 79      | 0.015 |      |
| FOXA1     |       |           |       |       |         |       |       |         |       | BRCA |
| Subclonal |       |           |       |       |         |       |       |         |       |      |
| vs WT     | 0     | 0-Inf     | 0.996 | 0     | 0-Inf   | 0.996 | 0     | 0-Inf   | 0.996 |      |
| Clonal vs |       | 1.61-12.2 |       |       | 1.80-14 |       |       | 1.73-1  |       |      |
| WT        | 4.44  | 4         | 0.004 | 5.08  | .35     | 0.002 | 4.87  | 3.71    | 0.003 |      |
| RB1       |       |           |       |       |         |       |       |         |       | BRCA |
| Subclonal |       | 2.69-47.1 |       |       | 2.85-52 |       |       | 2.87-5  |       |      |
| vs WT     | 11.27 | 4         | <.001 | 12.21 | .34     | <.001 | 12.32 | 2.84    | 0.001 |      |
| Clonal vs |       |           |       |       | 0.35-6. |       |       | 0.35-6. |       |      |
| WT        | 1.05  | 0.26-4.27 | 0.947 | 1.48  | 23      | 0.596 | 1.46  | 17      | 0.604 |      |
| BRCA1     |       |           |       |       |         |       |       |         |       | BRCA |
| Subclonal |       | 1.57-26.0 |       |       | 2.08-38 |       |       | 1.96-3  |       |      |
| vs WT     | 6.37  | 9         | 0.01  | 8.94  | .44     | 0.003 | 8.42  | 6.06    | 0.004 |      |
| Clonal vs |       |           |       |       | 0.040-2 |       |       | 0.08-4. |       |      |
| WT        | 0.47  | 0.06-3.37 | 0.453 | 0.33  | .71     | 0.299 | 0.56  | 18      | 0.576 |      |
| PMS2      |       |           |       |       |         |       |       |         |       | OV   |
| Subclonal |       | 2.76-149. |       |       | 6.26-41 |       |       | 6.26-4  |       |      |
| vs WT     | 20.29 | 31        | 0.003 | 51.16 | 8.26    | <.001 | 51.16 | 18.26   | <.001 |      |
| Clonal vs |       |           |       |       | 0.085-4 |       |       | 0.08-4. |       |      |
| WT        | 0.56  | 0.08-4.02 | 0.567 | 0.61  | .34     | 0.618 | 0.61  | 34      | 0.618 |      |

|           |           |           |       |         |       |       |         |       |       |      |
|-----------|-----------|-----------|-------|---------|-------|-------|---------|-------|-------|------|
| EGFR      |           |           |       |         |       |       |         |       |       | LGG  |
| Subclonal | 6.68-131. |           |       | 4.23-88 |       |       | 4.16-8  |       |       |      |
| vs WT     | 29.67     | 86        | 0     | 19.31   | .60   | <.001 | 18.57   | 2.89  | <.001 |      |
| Clonal vs | 3.15-64.4 |           |       | 1.98-41 |       |       | 1.97-4  |       |       |      |
| WT        | 14.25     | 8         | <.001 | 9.02    | .01   | 0.004 | 8.95    | 0.66  | 0.005 |      |
| NF1       |           |           |       |         |       |       |         |       |       | LGG  |
| Subclonal | 1.01-17.5 |           |       | 0.63-11 |       |       | 0.59-1  |       |       |      |
| vs WT     | 4.20      | 4         | 0.048 | 2.68    | .41   | 0.183 | 2.49    | 0.44  | 0.213 |      |
| Clonal vs | 1.65-10.6 |           |       | 2.50-17 |       |       | 2.39-1  |       |       |      |
| WT        | 4.19      | 3         | 0.003 | 6.66    | .76   | 4.189 | 6.23    | 6.24  | <.001 |      |
| PTEN      |           |           |       |         |       |       |         |       |       | LGG  |
| Subclonal | 2.08-22.6 |           |       | 2.24-25 |       |       | 2.25-2  |       |       |      |
| vs WT     | 6.86      | 5         | 0.002 | 7.52    | .28   | 0.001 | 7.47    | 4.79  | 0.001 |      |
| Clonal vs | 1.51-11.8 |           |       | 0.79-6. |       |       | 4.19-3  |       |       |      |
| WT        | 4.23      | 0         | 0.006 | 2.31    | .74   | 0.125 | 36.06   | 10.06 | 0.001 |      |
| ACVR2A    |           |           |       |         |       |       |         |       |       | STAD |
| Subclonal | 3.34-232. |           |       | 5.4-448 |       |       | 5.1-39  |       |       |      |
| vs WT     | 27.89     | 88        | 0.002 | 49.39   | .23   | <.001 | 44.89   | 5.33  | 0.001 |      |
| Clonal vs | 0.30-16.2 |           |       | 0.13-8. |       |       | 0.14-8. |       |       |      |
| WT        | 2.23      | 8         | 0.429 | 1.03    | .01   | 0.975 | 1.05    | 16    | 0.961 |      |
| CDKN2A    |           |           |       |         |       |       |         |       |       | PAAD |
| Subclonal | 0.47-33.4 |           |       | 0.30-34 |       |       | 0.26-2  |       |       |      |
| vs WT     | 3.98      | 7         | 0.203 | 3.24    | .81   | 0.331 | 2.56    | 4.89  | 0.419 |      |
| Clonal vs | 1.79-16.1 |           |       | 2.74-53 |       |       | 2.45-3  |       |       |      |
| WT        | 5.37      | 3         | 0.003 | 12.09   | .39   | 0.001 | 9.2     | 4.5   | 0.001 |      |
| CTCF      |           |           |       |         |       |       |         |       |       | HNSC |
| Subclonal |           |           |       | 1.02-5. |       |       | 0.57-2  |       |       |      |
| vs WT     | 2.51      | 1.11-5.71 | 0.029 | 2.38    | .58   | 0.045 | 4.09    | 9.61  | 0.163 |      |
| Clonal vs | 0.59-30.8 |           |       | 0.57-31 |       |       | 1.08-5. |       |       |      |
| WT        | 4.26      | 4         | 0.151 | 4.21    | .01   | 0.159 | 2.45    | 57    | 0.033 |      |
| TGFBR2    |           |           |       |         |       |       |         |       |       | HNSC |
| Subclonal |           |           |       |         |       |       | 18.92-  |       |       |      |
| vs WT     | 1.40-10.3 |           |       | 1.32-10 |       |       | 2301.1  |       |       |      |
|           | 3.80      | 1         | 0.009 | 3.71    | .47   | 0.013 | 208.66  | 7     | <.001 |      |
| Clonal vs |           |           |       | 0.41-2. |       |       | - - -   |       |       |      |
| WT        | 0.97      | 0.43-2.21 | 0.954 | 0.94    | .14   | 0.875 |         |       |       |      |
| ANK1      |           |           |       |         |       |       |         |       |       | KIRC |
| Subclonal | 1.00E     |           |       |         | -     | -     | -       | -     | -     |      |
| vs WT     | -04       | 0-Inf     | 0.997 |         |       |       |         |       |       |      |
| Clonal vs | 1.12-57.9 |           |       | 1.49-87 |       |       | 1.56-8  |       |       |      |
| WT        | 8.01      | 2         | 0.039 | 11.48   | .95   | 0.019 | 11.79   | 8.93  | 0.017 |      |
| IDH1      |           |           |       |         |       |       |         |       |       | GBM  |
| Subclonal |           |           |       |         |       |       |         |       |       |      |
| vs WT     | 0         | 0-Inf     | 0.988 | 0       | 0-Inf | 0.988 | 0       | 0-Inf | 0.988 |      |

|           |      |           |       |      |         |       |      |         |       |
|-----------|------|-----------|-------|------|---------|-------|------|---------|-------|
| Clonal vs |      |           |       |      | 0.24-0. |       |      | 0.25-0. |       |
| WT        | 0.41 | 0.21-0.79 | 0.008 | 0.47 | 92      | 0.027 | 0.48 | 93      | 0.03  |
| TERT      |      |           |       |      |         |       |      |         | BLCA  |
| Clonal vs |      | 1.53-28.6 |       |      | 0.83-22 |       |      | 1.15-2  |       |
| WT        | 6.63 | 8         | 0.011 | 4.32 | .44     | 0.081 | 5.5  | 6.26    | 0.032 |
